# Supplementary material
Source: HighWire-hosted journal article supplement (https://bmjopen.bmj.com/content/10/11/e041367)
Supplement: inline-supplementary-material-1 [file inline-supplementary-material-1.pdf]

**Supplementary Table A: Survey questions ascertaining vision impairment and other factors**

|                                                                         |                                                                                                                                                                                                                                                                                                                                                                                                                                                                                                                                                                                                                                                                                                                                                                                                                                                                                                                                                                                                                                                                                                                                                                                                                                                                                                                                                                                                                                                                                                  |
|-------------------------------------------------------------------------|--------------------------------------------------------------------------------------------------------------------------------------------------------------------------------------------------------------------------------------------------------------------------------------------------------------------------------------------------------------------------------------------------------------------------------------------------------------------------------------------------------------------------------------------------------------------------------------------------------------------------------------------------------------------------------------------------------------------------------------------------------------------------------------------------------------------------------------------------------------------------------------------------------------------------------------------------------------------------------------------------------------------------------------------------------------------------------------------------------------------------------------------------------------------------------------------------------------------------------------------------------------------------------------------------------------------------------------------------------------------------------------------------------------------------------------------------------------------------------------------------|
| <b>Vision impairment</b>                                                | Is there anyone in this house who is totally blind or has significant difficulty seeing? (Y/N)                                                                                                                                                                                                                                                                                                                                                                                                                                                                                                                                                                                                                                                                                                                                                                                                                                                                                                                                                                                                                                                                                                                                                                                                                                                                                                                                                                                                   |
| <b>Onset and duration of vision loss</b>                                | <b>IF YES,</b><br>When did the vision problem start? _____(days/weeks/years)<br>How did the vision problem start? _____                                                                                                                                                                                                                                                                                                                                                                                                                                                                                                                                                                                                                                                                                                                                                                                                                                                                                                                                                                                                                                                                                                                                                                                                                                                                                                                                                                          |
| <b>Care seeking practices</b>                                           | Has the [affected] family member sought any care for their eye problem? (Y/N)<br><b>IF YES,</b><br><ul style="list-style-type: none"> <li>• Where did they first seek care for this eye problem ? _____</li> <li>• Where did they next seek care for this eye problem? (ask as needed) _____</li> </ul> <b>If formal medical care was NOT sought FIRST [as a source of care]</b><br>What was the main reason why the [affected] family member did not go to the hospital first ? _____                                                                                                                                                                                                                                                                                                                                                                                                                                                                                                                                                                                                                                                                                                                                                                                                                                                                                                                                                                                                           |
| <b>Treatment and Barriers to care</b>                                   | Has the [affected] family member received any treatment for their eye problem? (Y/N)<br><b>IF YES,</b><br><ul style="list-style-type: none"> <li>• Did the doctor tell him/her what was wrong with their eye ? (Y/N)</li> <li>• IF YES, What did the doctor say was wrong with their eye? _____</li> <li>• What treatment did the family member receive at the hospital ? _____</li> </ul> Did the [affected] family member receive any eye operation? (Y/N)<br><b>IF NO,</b> Why was their eye not operated ?( Select all that apply)<br><ul style="list-style-type: none"> <li>• No Need</li> <li>• No Money</li> <li>• No transportation</li> <li>• No time</li> <li>• Facility, Personnel or Equipment not available</li> <li>• Person prefers traditional treatment or payer</li> <li>• Surgery planned but not yet received</li> <li>• Person avoided due to fear, mistrust, previous experience</li> </ul>                                                                                                                                                                                                                                                                                                                                                                                                                                                                                                                                                                                |
| <b>Functional limitations and Economic hardships</b>                    | Has this eye problem affected your family member's daily life? (Y/N)<br><b>IF YES,</b> How has it affected their daily life ? (select all apply)<br><ul style="list-style-type: none"> <li>• They have difficulty speaking or communicating</li> <li>• The person needs help dressing, eating or toileting</li> <li>• They have trouble interacting with others, shopping, traveling</li> <li>• They have trouble going to school</li> <li>• They have trouble working/ working in the home</li> <li>• They have difficulty standing or walking</li> <li>• They have difficulty picking things up or using their arms/hands</li> <li>• They have weakness, shortness of breath, or fatigue</li> <li>• They have trouble understanding or remembering things</li> <li>• They feel ashamed or depressed</li> <li>• Unknown/Unsure</li> <li>• Is there any other way this problem has affected their life ? (specify) _____</li> </ul> How has this problem affected your family? (select all that apply)<br><ul style="list-style-type: none"> <li>• Nothing has changed</li> <li>• The family earns less money</li> <li>• The family has spent assets/savings or borrowed money</li> <li>• It is harder to afford necessities like food and rent</li> <li>• Another person must help care for the person with the problem</li> <li>• Unknown/Unsure</li> </ul> <ul style="list-style-type: none"> <li>• Is there any other way this problem has affected your family ? (specify) _____</li> </ul> |
| <b>Belief that certain types of blindness are surgically reversible</b> | Do you believe certain types of blindness can be treated with an operation ? (Y/N)                                                                                                                                                                                                                                                                                                                                                                                                                                                                                                                                                                                                                                                                                                                                                                                                                                                                                                                                                                                                                                                                                                                                                                                                                                                                                                                                                                                                               |
